# Supplementary material for: Red Light Irradiation In Vivo Upregulates DJ-1 in the Retinal Ganglion Cell Layer and Protects against Axotomy-Related Dendritic Pruning
Source: MDPI journal article supplement (doi:10.3390/ijms22168380), 2021-08-04
Supplement: s1 [file s1]

## Supplementary Material

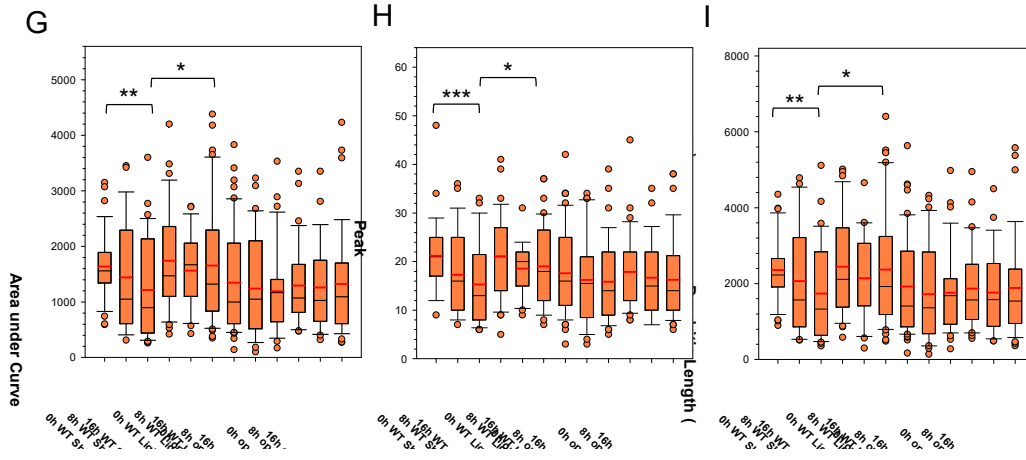

Supplementary Figure S1: Box and whisker plots corresponding to the bar charts shown in Figure 2 G, H and I.

(G) the area under the Sholl curve (AUC); (H) average maximum peak of Sholl curve; and (I) average total dendritic length of the entire population of RGCs. All measures revealed significant degeneration over 16 hours in the sham-treated WT RGCs which was inhibited by the light treatment, as shown by the 16-hour WT light group having significantly greater dendritic complexity. Black line: mean; Red line: median. The ends of boxes correspond to the 25<sup>th</sup> and 75<sup>th</sup> percentiles, the whiskers correspond to the 10<sup>th</sup> and 90<sup>th</sup>. \*  $p < 0.05$ , \*\*  $p < 0.01$ , \*\*\*  $p < 0.001$ , †  $p < 0.05$ ; Mann-Whitney  $U$  test.

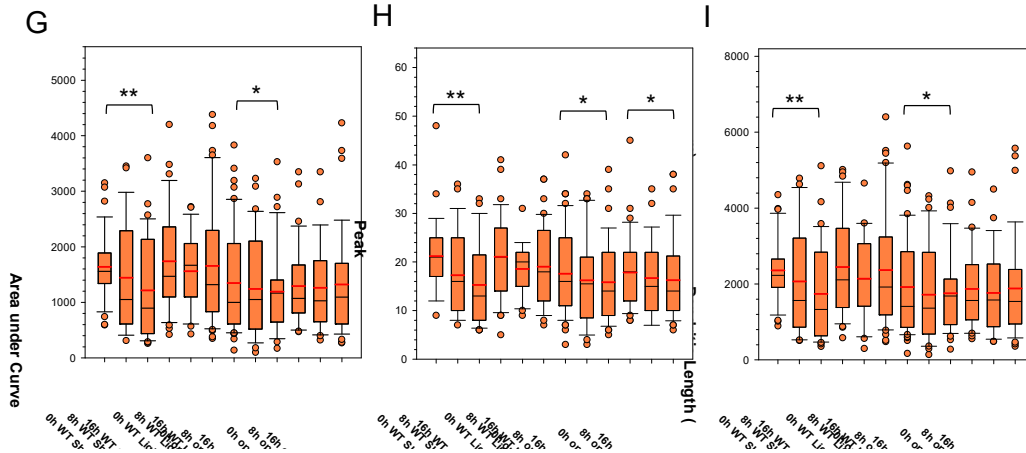

Supplementary Figure S2: Box and whisker plots corresponding to the bar charts shown in Figure 3 G, H and I.

(G) the area under the Sholl curve (AUC); (H) average maximum peak of Sholl curve; and (I) average total dendritic length of the ON-center sub-population of RGCs. All measures revealed significant degeneration over 16 hours in the sham-treated WT and *Opn1<sup>+/-</sup>* RGCs. Black line: mean; Red line: median. The ends of boxes correspond to the 25<sup>th</sup> and 75<sup>th</sup> percentiles, the whiskers correspond to the 10<sup>th</sup> and 90<sup>th</sup>. \*  $p < 0.05$ , \*\*  $p < 0.01$ , \*\*\*  $p < 0.001$ , +  $p < 0.05$ ; Mann-Whitney *U* test.
